# Supplementary material for: Development of Recombinant Oncolytic rVSV-mIL12-mGMCSF for Cancer Immunotherapy
Source: MDPI journal article supplement (doi:10.3390/ijms25010211), 2023-12-22
Supplement: s1 [file s1]

| Name    | Sequence (5'-3')                                  |
|---------|---------------------------------------------------|
| prim#1  | CTGTTT <u>ACGCGT</u> CACTATGAAGTGCCTTTTGTACTTAGCC |
| prim#2  | GCGAGTT <u>GCTAGCA</u> ATTAATTCTC                 |
| prim#3  | GACACCTATGATCCGAATCAATTAAGATATGAGA                |
| prim#4  | CTCGTCAACTCCAAAATAGGATTTGTCAATTGGA                |
| prim#5  | GCAAAGAATTCGCCGCCACCATGGAAGTCCACGATTTTGAGACC      |
| prim#6  | GAGGAGTGCGGCCGCTTAATCTCTCCAAGAGTTTTCCTCGTG        |
| prim#7  | GCAAAGAATTCGCCGCCACCATGGATAATCTCACAAAAGTTTCG      |
| prim#8  | GAGGAGTGCGGCCGCTACAGAGAATATTTGACTCTCG             |
| prim#9  | GCAAAGAATTCGCCGCCACCATGTCTGTTACAGTCAAGAGAATC      |
| prim#10 | GAGGAGTGCGGCCGCTCATTTGTCAAATTCTGACTTAGC           |
| prim#11 | GCGGCTAGCGACATGGAGACAGACACCCTCCTGC                |
| prim#12 | GCGCCTAGGTTATGCCTTCTGCCCTGGTTTCTTGC               |

**Supplementary Table S1.** Cloning and mutagenesis primers used to construct plasmids in this study. Restriction sites are underlined.
