# Supplementary material for: Development of Recombinant Oncolytic rVSV-mIL12-mGMCSF for Cancer Immunotherapy
Source: MDPI journal article supplement (doi:10.3390/ijms25010211), 2023-12-22
Supplement: s1 [file s1]

METDTLLLWVLLLWVPGSTGAGGKPSGGRVIPVSGPARCLSQSRNLLKTTDDMVKTAREKLKHY  
SCTAEDIDHEDITRDQTSTLKTCLPLELHKNESCLATRETSSTTRGSCLPPQKTSLMMTLCLGS  
IYEDLKMYQTEFQAINAALQNHNHQQIILDKGMLVAIDELMQSLNHNGETLRQKPPVGEADPYR  
VKMKLCILLHAFSTRVVTINRVMGYLSSGGGSGGGGSGGGGSMWELEKDVYVVEVDWTPDAPG  
ETVNLTCDTPEEDDITWTS DQRHGVIGSGKTLTITVKEFLDAGQYTCHKGGETLSHSHLLLHKK  
ENGIWSTEILKNFKNKTF LKCEAPNYSGRFTCSWL VQRNMDLKFNKSSSSSPDSRAVTCGMAS  
LSAEKVTLDQRDYEKYSVSCQEDVTCPTAEETLPIELALEARQQNKYENYSTSFFIRDIIKPDP  
PKNLQMKPLKNSQVEVSWEYPDSWSTPHSYFSLKFFVRIQRKKEKMKETEEGCNQKGAFLVEKT  
STEVQCKGGNVCVQAQDRYYNSSCSKWACVPCRVRSGGGGSGGGGSAPTRSPITVTRPWKHVEA  
IKEALNLLDDMPVTLNEEVEVSNEFSFKKLT CVQTRLKIFEQGLRGNFTKLKGALNMTASY YQ  
TYCPPTPETDCETQVT TYAD FIDSLKTFLTDIPFECKKPGQKA

**Supplementary Figure S2.** The amino acid sequence of mIL12-mGMCSF fusion used in this study. Signal peptide is underlined, the linker connecting the fused proteins is in blue.
